# Supplementary material for: A High Malaria Prevalence Identified by PCR among Patients with Acute Undifferentiated Fever in India
Source: PubMed Central journal article supplement (PMC4936667; doi:10.1371/journal.pone.0158816), 2016-07-07
Supplement: pone.0158816.s002.pdf [file pone.0158816.s002.pdf]

**S1 Table. The sensitivity and specificity of three diagnostic methods detecting malaria, among the patients where all methods were performed (N=1163).**

| No. of cases with the following test results: |                                  |                                  |                                  |                                  |                                  |                                  |                                  |
|-----------------------------------------------|----------------------------------|----------------------------------|----------------------------------|----------------------------------|----------------------------------|----------------------------------|----------------------------------|
| RDT <sup>+</sup> RM <sup>+</sup>              | RDT <sup>+</sup> RM <sup>-</sup> | RDT <sup>-</sup> RM <sup>+</sup> | RDT <sup>-</sup> RM <sup>-</sup> | RDT <sup>+</sup> RM <sup>-</sup> | RDT <sup>-</sup> RM <sup>+</sup> | RDT <sup>+</sup> RM <sup>+</sup> | RDT <sup>-</sup> RM <sup>-</sup> |
| PCR <sup>+</sup>                              | PCR <sup>+</sup>                 | PCR <sup>+</sup>                 | PCR <sup>+</sup>                 | PCR <sup>-</sup>                 | PCR <sup>-</sup>                 | PCR <sup>-</sup>                 | PCR <sup>-</sup>                 |
| 41 (3.5%)                                     | 18 (1.5%)                        | 25 (2.1%)                        | 144 (12.4%)                      | 7 (0.6%)                         | 20 (1.7%)                        | 2 (0.2%)                         | 906 (77.9%)                      |

**Abbreviations:** RM, routine microscopy; RDT, rapid diagnostic test; PCR, polymerase chain reaction.
